# Supplementary material
Source: publisher figshare collection journal article supplement (https://asha.figshare.com/ndownloader/files/14867753)
Supplement: Supplementary file 1 [file 14867753]

## Sheet: Appendix B
Online supplemental material, Rudner et al., "Poorer Speech Reception Threshold in Noise Is Associated With Lower Brain Volume in Auditory and Cognitive Processing Regions," JSLHR
https://doi.org/10.1044/2018_JSLHR-H-ASCC7-18-0142
Supplemental Material S2
Model 2
							Effect of Age					Effect of Gender					Effect of TDI					Effect of Vision Disorder					Effect of Vascular Disorder					Effect of VR					Effect of SRTn					Effect of HA use
UK B		Extract.		Mean vol.	vol. SD	R2		Vol. change					Vol. change					Vol. change					Vol. change					Vol. change					Vol. change					Vol. change					Vol. change
Datafield	Region	method	Prediction	N=8699			p =	mm3	%	SES		p =	mm3	%	SES		p =	mm3	%	SES		p =	mm3	%	SES		p =	mm3	%	SES		p =	mm3	%	SES		p =	mm3	%	SES		p =	mm3	%	SES
25006	Whole brain, Grey matter			795668	47901.3	0.441642	0	-26903.1	-3.3812	-0.561635		0	28834	3.62388	0.601946		1.21809e-05	-1691.82	-0.212629	-0.0353188		0.00322364	-3276.63	-0.411809	-0.0684038		8.13577e-09	-5092.08	-0.639976	-0.106304		0.0269539	-860.49	-0.108147	-0.0179638		0.0114221	-1023.66	-0.128655	-0.0213702		0.0383992	-3523.83	-0.442877	-0.0735644
25008	Whole brain, White matter			711007	40799.6	0.0980467	0	-12698.8	-1.78604	-0.311249		0	-10022.2	-1.40958	-0.245645		0.26576	-465.621	-0.0654875	-0.0114124		0.0246944	-2704.06	-0.380314	-0.0662767		0.338252	-914.545	-0.128627	-0.0224156		0.855789	76.502	0.0107597	0.00187507		0.515462	284.814	0.0400578	0.0069808		0.0566968	-3510.13	-0.493684	-0.0860335
25010	Whole brain, grey+white matter			1.50668e+06	72925	0.319217	0	-39601.9	-2.62843	-0.543049		0	18811.8	1.24856	0.257961		0.000902343	-2157.43	-0.143192	-0.0295843		0.00138202	-5980.72	-0.396949	-0.082012		5.16363e-05	-6006.69	-0.398672	-0.0823681		0.230526	-783.877	-0.052027	-0.0107491		0.277348	-738.837	-0.0490375	-0.0101315		0.0139433	-7034	-0.466856	-0.0964553
25011	Thalamus, L	FIRST	Auditory	10070.9	825.7	0.243471	0	-342.598	-3.40186	-0.414918		0	385.057	3.82346	0.46634		0.0527891	-15.0227	-0.149169	-0.0181939		0.0141087	-54.7815	-0.543958	-0.0663455		7.89852e-07	-87.4834	-0.868675	-0.10595		0.107328	-12.5677	-0.124792	-0.0152206		0.192519	-10.5805	-0.105061	-0.012814		0.0458945	-68.1725	-0.676926	-0.0825633
25012	Thalamus, R	FIRST	Auditory	9814.46	783.148	0.241364	0	-330.475	-3.36723	-0.421983		0	347.336	3.53902	0.443513		0.0957753	-12.2714	-0.125033	-0.0156693		0.0219882	-48.5534	-0.494713	-0.0619978		1.66236e-06	-80.6076	-0.821314	-0.102928		0.0509003	-14.4718	-0.147454	-0.018479		0.0352211	-16.2395	-0.165465	-0.0207362		0.060103	-60.9737	-0.621264	-0.0778572
25013	Caudate, L	FIRST	None	4383.39	470.037	0.0720105	0	-72.1657	-1.64635	-0.153532		0	178.094	4.06293	0.378893		0.0676918	-8.93448	-0.203826	-0.019008		0.128147	-21.4047	-0.488314	-0.0455383		0.839177	-2.2651	-0.0516747	-0.00481899		0.10882	-7.88936	-0.179983	-0.0167846		0.831301	1.09033	0.0248742	0.00231968		0.348561	-20.1777	-0.460323	-0.042928
25014	Caudate, R	FIRST	None	4611.87	496.055	0.0607692	0	-60.8021	-1.31838	-0.122571		0	191.074	4.14308	0.385187		0.0708689	-9.3777	-0.203338	-0.0189046		0.711835	-5.51694	-0.119625	-0.0111216		0.903151	1.44184	0.0312637	0.00290662		0.278347	-5.66215	-0.122773	-0.0114144		0.731983	-1.861	-0.0403524	-0.0037516		0.648235	-10.4256	-0.226061	-0.0210171
25015	Putamen, L	FIRST	None	6227.93	680.155	0.139137	0	-271.318	-4.35647	-0.398905		3.97238e-12	96.1435	1.54375	0.141355		0.209583	-8.55074	-0.137297	-0.0125717		0.832819	-4.13855	-0.0664514	-0.00608471		0.00108408	-50.8454	-0.816409	-0.0747555		0.0427211	-13.8957	-0.223119	-0.0204302		0.216421	-8.81755	-0.141581	-0.012964		0.633362	-14.3097	-0.229766	-0.0210388
25016	Putamen, R	FIRST	None	6280.37	642.945	0.123026	0	-241.479	-3.84499	-0.375583		8.41454e-09	76.1164	1.21197	0.118387		0.194731	-8.43091	-0.134242	-0.013113		0.748443	5.99858	0.0955132	0.00932984		0.00702816	-40.0104	-0.63707	-0.0622298		0.00797114	-17.3597	-0.276413	-0.0270003		0.0493035	-13.3804	-0.213051	-0.0208111		0.557283	-16.7971	-0.267454	-0.0261252
25017	Pallidum, L	FIRST	None	2277.07	285.585	0.0366285	0	-47.1687	-2.07147	-0.165165		0	61.4238	2.69749	0.215081		0.00320579	-8.81081	-0.386937	-0.0308518		0.0182298	-20.2528	-0.889426	-0.070917		0.0213796	-15.6777	-0.688502	-0.0548966		0.409478	-2.48378	-0.109078	-0.00869718		0.425124	-2.49861	-0.109729	-0.00874908		0.29452	13.861	0.608723	0.0485356
25018	Pallidum, R	FIRST	None	2337.3	288.293	0.0605913	0	-63.9874	-2.73766	-0.221953		0	71.936	3.07774	0.249524		0.0141652	-7.35348	-0.314614	-0.025507		0.0813126	-15.0075	-0.642089	-0.0520567		3.12851e-05	-28.3723	-1.21389	-0.0984149		0.0174897	-7.16723	-0.306646	-0.0248609		0.0425928	-6.36343	-0.272256	-0.0220728		0.344146	12.5352	0.536311	0.0434808
25019	Hippocampus, L	FIRST	cognitive	4934.15	620.961	0.129905	0	-172.37	-3.4934	-0.277585		0	300.582	6.09187	0.484059		0.177271	-8.44	-0.171053	-0.0135918		0.957079	-0.968564	-0.0196298	-0.00155978		1.5543e-05	-61.7269	-1.25101	-0.0994053		0.00770768	-16.7735	-0.339947	-0.0270122		0.050071	-12.8304	-0.260032	-0.0206621		0.91418	-2.96755	-0.0601431	-0.00477897
25020	Hippocampus, R	FIRST	cognitive	5071.4	618.53	0.117641	0	-182.988	-3.60823	-0.295843		0	272.346	5.37023	0.440311		0.992538	-0.0586875	-0.00115723	-9.48822e-05		0.23116	-21.6174	-0.426261	-0.0349496		0.00227588	-43.7209	-0.862107	-0.0706851		0.0285075	-13.8298	-0.272703	-0.0223592		0.00333768	-19.281	-0.380191	-0.0311723		0.837547	-5.66369	-0.111679	-0.00915669
25021	Amygdala, L	FIRST	None	1663.61	302.344	0.00488932	0.445183	-6.43896	-0.387048	-0.0212968		0.0896578	11.2263	0.674816	0.0371309		0.332674	-3.15538	-0.189671	-0.0104364		0.690989	-3.72504	-0.223913	-0.0123205		7.58629e-06	-33.3008	-2.00172	-0.110142		0.0684362	-5.97187	-0.358971	-0.0197519		0.0138286	-8.39413	-0.504574	-0.0277635		0.110558	22.8813	1.3754	0.0756796
25022	Amygdala, R	FIRST	None	1627.94	340.542	0.00333798	0.17253	-4.24699	-0.260881	-0.0124713		0.723074	-2.64172	-0.162273	-0.00775739		0.577979	-2.04248	-0.125464	-0.00599772		0.884097	1.53976	0.0945829	0.00452148		8.36761e-05	-32.9784	-2.02577	-0.0968409		0.228422	-4.44913	-0.273298	-0.0130648		0.137288	-5.71066	-0.35079	-0.0167693		0.987801	0.247109	0.0151792	0.000725634
25023	Accumbens, L	FIRST	None	658.834	146.723	0.151419	0	-61.9903	-9.40908	-0.4225		3.86358e-14	22.4619	3.40933	0.153091		0.00618609	-3.99705	-0.606684	-0.0272422		0.231138	-5.02883	-0.763292	-0.0342744		1.75919e-10	-21.2853	-3.23075	-0.145072		0.7859	-0.398936	-0.0605518	-0.00271899		0.0303586	-3.30887	-0.502231	-0.0225519		0.576747	-3.58648	-0.544368	-0.024444
25024	Accumbens, R	FIRST	None	523.28	139.828	0.184456	0	-68.5214	-13.0946	-0.49004		1.11022e-15	22.2559	4.25315	0.159166		0.00485037	-3.84218	-0.73425	-0.0274779		0.348223	-3.68045	-0.703343	-0.0263212		2.82971e-09	-18.5126	-3.53779	-0.132395		0.823459	0.306111	0.0584984	0.00218919		0.157326	-2.01869	-0.385776	-0.0144369		0.464569	4.39055	0.839043	0.0313996
25025	Brain stem + 4th vent.	FIRST	Auditory	29485.3	2706.7	0.0181342	6.30163e-12	-343.28	-1.16424	-0.126826		3.74313e-07	299.1	1.0144	0.110503		0.0959329	-48.2262	-0.16356	-0.0178173		0.0214933	-191.624	-0.649897	-0.0707962		1.68874e-05	-284.606	-0.965245	-0.105149		0.138772	-43.144	-0.146324	-0.0159397		0.842435	6.02655	0.0204391	0.00222653		0.200281	-163.31	-0.553869	-0.0603355
25782	Frontal Pole, L	H-O-D	None	30033	2749.12	0.190574	0	-982.988	-3.27303	-0.357565		0	857.501	2.8552	0.311918		0.0626324	-49.7731	-0.165728	-0.0181051		0.0925227	-129.215	-0.430244	-0.0470024		0.815541	-14.2427	-0.0474236	-0.00518084		0.376754	-23.7836	-0.0791915	-0.00865135		0.00361085	-81.4086	-0.271064	-0.0296126		0.563055	-68.0332	-0.226528	-0.0247473
25783	Frontal Pole, R	H-O-D	None	33818.7	3021.92	0.187633	0	-1000.58	-2.95866	-0.331108		0	908.886	2.68753	0.300765		0.0962758	-48.8626	-0.144484	-0.0161694		0.423573	-67.6168	-0.199939	-0.0223755		0.0117146	-168.752	-0.49899	-0.0558426		0.350151	27.647	0.0817508	0.00914884		0.00360644	-89.4699	-0.264558	-0.029607		0.0248214	-289.227	-0.855229	-0.0957099
25784	Insular Cx, L	H-O-D	cognitive	8089.12	667.359	0.113778	0	-142.728	-1.76444	-0.21387		0	270.71	3.3466	0.405644		0.386869	-5.87083	-0.0725769	-0.00879711		0.377844	-17.214	-0.212805	-0.0257942		0.0946429	-25.8859	-0.320009	-0.0387886		0.109688	10.92	0.134996	0.0163629		0.0275569	-15.6508	-0.193479	-0.0234518		0.338289	-28.5996	-0.353557	-0.0428549
25785	Insular Cx, R	H-O-D	cognitive	8077.04	662.729	0.0963258	0	-122.788	-1.52021	-0.185276		0	258.473	3.20009	0.390013		0.107292	-10.9584	-0.135674	-0.0165353		0.503357	-13.1002	-0.16219	-0.019767		0.0965264	-25.8129	-0.319583	-0.0389494		0.0253697	15.3073	0.189516	0.0230974		0.0135006	-17.5961	-0.217854	-0.026551		0.207255	-37.7758	-0.467693	-0.0570003
25786	Superior Frontal Gyrus, L	H-O-D	None	14218.8	1994.77	0.078424	0	-412.141	-2.89857	-0.20661		0	638.477	4.49039	0.320075		0.0766411	-36.9415	-0.259808	-0.0185191		0.0908295	-101.28	-0.712299	-0.0507727		0.44357	-36.4879	-0.256618	-0.0182918		0.932813	1.7721	0.0124631	0.000888372		0.262309	-24.4908	-0.172243	-0.0122775		0.366102	-82.8746	-0.582854	-0.0415458
25787	Superior Frontal Gyrus, R	H-O-D	None	12337.7	1836.41	0.0539512	0	-321.465	-2.60554	-0.175051		0	462.266	3.74676	0.251722		0.781365	-5.36224	-0.0434621	-0.00291996		0.419609	-44.7925	-0.363053	-0.0243914		0.616931	22.0842	0.178997	0.0120258		0.396108	16.5109	0.133825	0.00899087		0.492351	13.8959	0.112629	0.00756688		0.357887	78.4645	0.635971	0.0427271
25788	Middle Frontal Gyrus, L	H-O-D	cognitive	12951.3	1979.15	0.0567125	0	-338.544	-2.61398	-0.171056		0	418.725	3.23308	0.211569		0.0779152	-36.6199	-0.282751	-0.0185029		0.731998	20.5105	0.158366	0.0103633		0.720783	-16.9582	-0.130938	-0.00856843		0.995547	0.116808	0.000901906	5.90196e-05		0.181233	-29.0773	-0.224513	-0.0146918		0.346307	-85.9497	-0.663639	-0.0434277
25789	Middle Frontal Gyrus, R	H-O-D	cognitive	12291	1879.31	0.0545212	0	-324.241	-2.63803	-0.172532		0	374.357	3.04577	0.199199		0.0546611	-37.8717	-0.308125	-0.020152		0.128513	-86.0156	-0.699825	-0.0457699		0.05895	85.3878	0.694717	0.0454358		0.621154	-9.81049	-0.0798183	-0.00522027		0.00259878	-62.0772	-0.505061	-0.033032		0.64169	-40.3654	-0.328414	-0.0214789
25790	IFG, pars triang., L	H-O-D	cognitive	3165.8	741.494	0.0598289	0	-155.212	-4.90276	-0.209323		0	161.718	5.10828	0.218097		0.560397	4.59506	0.145147	0.00619703		0.265096	25.3869	0.801911	0.0342375		0.154759	25.7191	0.812404	0.0346855		0.693528	3.12832	0.0988161	0.00421894		0.921749	-0.810755	-0.0256098	-0.00109341		0.709701	-12.897	-0.407385	-0.0173933
25791	IFG, pars triang., R	H-O-D	cognitive	2915.73	629.21	0.0604771	0	-110.716	-3.79721	-0.175961		0	137.267	4.70781	0.218158		0.815623	1.54377	0.0529462	0.0024535		0.970195	0.711575	0.0244047	0.0011309		0.405942	12.583	0.431554	0.019998		0.21288	-8.28414	-0.284119	-0.0131659		0.0432772	-13.9699	-0.479123	-0.0222023		0.961843	1.39427	0.047819	0.00221591
25792	IFG, pars operc., L	H-O-D	cognitive	3438.12	669.841	0.0963649	0	-165.211	-4.80528	-0.246643		0	192.846	5.60906	0.287898		0.442441	-5.32265	-0.154813	-0.00794614		0.618006	9.96437	0.289821	0.0148757		0.194785	-20.4643	-0.595219	-0.030551		0.499668	-4.70686	-0.136902	-0.00702683		0.014584	-17.6883	-0.514476	-0.0264067		0.853772	-5.62224	-0.163527	-0.00839339
25793	IFG, pars operc., R	H-O-D	cognitive	3197.59	667.486	0.0776907	0	-147.257	-4.60525	-0.220615		0	185.196	5.79173	0.277453		0.213418	-8.5735	-0.268124	-0.0128445		0.43043	-15.6133	-0.488282	-0.0233911		0.51722	-10.1835	-0.318475	-0.0152566		0.10051	-11.382	-0.355956	-0.0170521		0.483974	5.05896	0.158211	0.00757912		0.704177	-11.5117	-0.360011	-0.0172463
25794	Precentral Gyrus, L	H-O-D	cognitive	18460.8	2020.94	0.156705	0	-578.418	-3.13323	-0.286213		0	940.496	5.09457	0.465376		0.0803653	-35.1891	-0.190616	-0.0174123		0.603589	-30.0656	-0.162862	-0.0148771		0.000158252	-172.942	-0.936808	-0.0855751		0.188981	-26.6031	-0.144106	-0.0131637		0.00405872	-60.499	-0.327716	-0.0299361		0.695565	-34.6648	-0.187775	-0.0171528
25795	Precentral Gyrus, R	H-O-D	cognitive	17968.5	2030.03	0.153908	0	-609.607	-3.39263	-0.300295		0	860.723	4.79016	0.423996		0.0152143	-49.0334	-0.272885	-0.0241541		0.239724	-68.285	-0.380025	-0.0336375		8.70576e-06	-204.253	-1.13673	-0.100616		0.200878	-26.0108	-0.144757	-0.012813		0.105934	-34.1976	-0.190319	-0.0168459		0.122384	-137.032	-0.762619	-0.0675024
25796	Temp. Pole, L	H-O-D	None	12425.8	1427.22	0.0896915	0	-407.669	-3.28082	-0.285639		1.64783e-08	168.691	1.35758	0.118196		0.1978	-18.9342	-0.152378	-0.0132665		0.853516	-7.80946	-0.0628486	-0.00547181		9.64569e-05	-130.91	-1.05353	-0.0917242		0.0134936	-36.5492	-0.294139	-0.0256087		0.0197411	-35.88	-0.288753	-0.0251398		0.110703	-103.237	-0.830825	-0.0723345
25797	Temp. Pole, R	H-O-D	None	12352.1	1407.29	0.0892007	0	-379.031	-3.06855	-0.269334		0	270.286	2.18817	0.192061		0.154896	-20.6315	-0.167028	-0.0146604		0.291662	44.0016	0.356227	0.0312669		8.47892e-05	-130.177	-1.05388	-0.0925018		0.196099	-18.8652	-0.152729	-0.0134054		0.166536	-21.0031	-0.170036	-0.0149245		0.0935793	-107.067	-0.866791	-0.0760805
25798	STG, ant., L	H-O-D	Auditory	1907.61	353.087	0.0516972	0	-63.3965	-3.32336	-0.179549		1.53323e-07	40.5523	2.12582	0.114851		0.659376	-1.6575	-0.0868891	-0.00469431		0.595591	5.75333	0.301599	0.0162943		4.32067e-05	-34.8139	-1.82501	-0.0985986		0.00755514	10.1403	0.531573	0.028719		0.00423907	-11.2309	-0.588745	-0.0318078		0.631595	7.95741	0.417141	0.0225367
25799	STG, ant., R	H-O-D	Auditory	1915.4	359.448	0.0527305	0	-69.2107	-3.61338	-0.192547		2.8566e-11	52.3137	2.73121	0.145539		0.788305	1.02465	0.0534954	0.00285062		0.414053	8.98612	0.469152	0.0249998		8.48268e-05	-33.9368	-1.77179	-0.0944136		0.00369896	11.1772	0.583545	0.0310955		0.271868	-4.38284	-0.228821	-0.0121932		0.466529	-12.1898	-0.636412	-0.0339126
25800	STG, post., L	H-O-D	Auditory	3368.44	578.474	0.0743214	0	-133.558	-3.96497	-0.230879		1.11022e-16	104.019	3.08806	0.179817		0.435701	4.71694	0.140034	0.00815411		0.0642286	-32.0459	-0.95136	-0.0553974		0.100106	-22.6225	-0.671603	-0.0391072		0.167277	8.41333	0.24977	0.014544		0.00166595	-19.8482	-0.589242	-0.0343114		0.637332	12.5732	0.373267	0.0217352
25801	STG, post., R	H-O-D	Auditory	4053.63	631.991	0.0975488	0	-181.81	-4.48512	-0.287679		0	148.281	3.65797	0.234625		0.226574	7.91276	0.195202	0.0125204		0.0630311	-34.8151	-0.858862	-0.055088		0.218849	-18.3065	-0.451608	-0.0289664		0.712676	-2.42141	-0.0597344	-0.0038314		0.00848094	-17.975	-0.443431	-0.0284419		0.749837	9.1861	0.226614	0.0145352
25802	MiTG, ant., L	H-O-D	Auditory	2384.77	456.478	0.0464469	0	-86.7348	-3.63702	-0.190009		4.02008e-06	-45.0328	-1.88835	-0.0986527		0.154182	-6.90578	-0.289578	-0.0151284		0.54852	-8.36282	-0.350676	-0.0183203		4.67996e-11	-71.8866	-3.0144	-0.157481		0.0921352	8.23904	0.345485	0.0180492		0.744396	1.65686	0.0694765	0.00362965		0.613216	10.8242	0.453887	0.0237124
25803	MiTG, ant., R	H-O-D	Auditory	2103.08	372.891	0.041152	0	-62.2116	-2.95811	-0.166836		0.00121331	26.0985	1.24096	0.0699898		0.40642	-3.27382	-0.155668	-0.00877959		0.38164	9.95696	0.473446	0.0267021		1.87717e-06	-42.5262	-2.02209	-0.114045		0.610558	2.02312	0.0961979	0.00542551		0.300052	-4.2766	-0.203349	-0.0114688		0.415801	-14.0894	-0.669942	-0.0377844
25804	MiTG, post., L	H-O-D	Auditory	6893.97	991.863	0.0917349	0	-249.247	-3.61543	-0.251292		0	207.499	3.00986	0.209201		0.67608	-4.28179	-0.0621091	-0.00431691		0.58463	-16.1031	-0.233582	-0.0162352		0.000734711	-78.5769	-1.13979	-0.0792215		0.0129952	-25.5761	-0.370992	-0.0257859		0.0127674	-26.6732	-0.386906	-0.026892		0.627014	21.9639	0.318595	0.022144
25805	MiTG, post., R	H-O-D	Auditory	7136.9	1003.2	0.118732	0	-274.153	-3.84134	-0.273279		0	347.403	4.8677	0.346296		0.396928	-8.63825	-0.121036	-0.00861073		0.0549722	-56.119	-0.786323	-0.0559403		0.0596729	-43.7292	-0.61272	-0.0435899		0.126344	-15.677	-0.219661	-0.015627		0.0798973	-18.6808	-0.26175	-0.0186213		0.196987	58.1887	0.815323	0.0580034
25806	MiTG, temporooccip., L	H-O-D	Auditory	4520.29	946.878	0.0354531	0	-88.8893	-1.96645	-0.0938762		0	188.985	4.18082	0.199588		0.0713938	-18.1074	-0.40058	-0.0191233		0.0430423	-58.4637	-1.29336	-0.0617437		0.0718764	-41.2617	-0.912811	-0.0435766		0.58568	-5.50773	-0.121845	-0.00581673		0.249001	-12.1179	-0.268078	-0.0127977		0.438669	-34.2368	-0.757403	-0.0361576
25807	MiTG, temporooccip., R	H-O-D	Auditory	6088.96	1090.31	0.0289192	0	-145.935	-2.39672	-0.133848		0.00671628	-63.8841	-1.04918	-0.0585929		0.0466453	-23.0886	-0.379188	-0.0211762		0.0220522	-76.4449	-1.25547	-0.0701133		0.0493225	-52.0737	-0.855216	-0.0477607		0.319924	-11.6126	-0.190715	-0.0106507		0.164939	-16.8677	-0.277021	-0.0154706		0.151556	-73.2592	-1.20315	-0.0671914
25808	ITG, ant., L	H-O-D	None	1883.03	388.515	0.0273199	0	-53.968	-2.86602	-0.138909		0.0762761	-14.7854	-0.785195	-0.0380563		0.901539	-0.510041	-0.0270862	-0.0013128		0.812592	2.81453	0.149468	0.00724433		4.04871e-05	-38.2563	-2.03164	-0.098468		0.0296332	-9.00246	-0.478085	-0.0231715		0.453959	3.23468	0.171781	0.00832576		0.455086	-13.5096	-0.717442	-0.0347725
25809	ITG, ant., R	H-O-D	None	1958.06	345.106	0.0266234	0	-49.2159	-2.5135	-0.142611		0.0105451	19.1861	0.979853	0.0555949		0.193161	-4.77762	-0.243998	-0.0138439		0.280266	11.4522	0.584875	0.0331846		0.000373287	-29.6394	-1.51371	-0.085885		0.0496512	-7.24706	-0.370115	-0.0209995		0.0639929	-7.1143	-0.363334	-0.0206148		0.181642	-21.496	-1.09782	-0.0622883
25810	ITG, post., L	H-O-D	None	5377.06	890.706	0.0269563	0	-156.072	-2.90256	-0.175223		0.220779	-23.6035	-0.438968	-0.0264998		0.0053004	-26.4657	-0.492196	-0.0297131		0.0650382	50.7412	0.94366	0.0569673		0.635354	-10.2877	-0.191326	-0.01155		0.110806	-15.2425	-0.283473	-0.0171128		0.772712	-2.87539	-0.0534751	-0.00322821		0.188158	55.4018	1.03034	0.0621998
25811	ITG, post., R	H-O-D	None	5436.44	866.38	0.0442607	0	-153.8	-2.82906	-0.177521		1.69836e-06	90.3463	1.66186	0.10428		0.00185833	-28.6032	-0.526137	-0.0330145		0.418547	21.4848	0.395199	0.0247983		0.00329028	-61.4759	-1.13081	-0.0709572		0.0264821	-20.5338	-0.377707	-0.0237007		0.01612	-23.1585	-0.425987	-0.0267302		0.695319	-15.861	-0.291754	-0.0183072
25812	ITG, temporooccip., L	H-O-D	None	3920.31	731.708	0.00781658	2.49537e-10	-36.8317	-0.939508	-0.0503366		0.809344	3.85618	0.098364	0.00527011		0.346043	-7.41672	-0.189187	-0.0101362		0.183113	-30.1465	-0.768981	-0.0412001		0.90784	-2.07978	-0.0530513	-0.00284236		0.583253	-4.34475	-0.110827	-0.00593782		0.202639	-10.497	-0.267758	-0.0143458		0.515495	-22.5323	-0.574758	-0.0307941
25813	ITG, temporooccip., R	H-O-D	None	4991.82	874.032	0.0165893	2.17007e-09	-62.2423	-1.24689	-0.0712128		0	-173.648	-3.47865	-0.198675		0.130951	-14.1369	-0.283201	-0.0161743		0.076157	-47.7578	-0.956721	-0.0546408		0.097313	-35.4241	-0.709642	-0.0405295		0.165125	-13.0716	-0.26186	-0.0149555		0.362117	-8.92832	-0.178859	-0.0102151		0.359922	-37.7214	-0.755664	-0.0431579
25814	Postcentral Gyrus, L	H-O-D	None	14798.2	1838.37	0.179876	0	-498.024	-3.36544	-0.270905		0	1085.59	7.33597	0.590518		0.364917	-16.2893	-0.110076	-0.00886071		0.0301422	-111.801	-0.755507	-0.0608155		1.39836e-06	-196.933	-1.33079	-0.107124		0.0060326	-49.6262	-0.335353	-0.0269946		0.0743486	-33.5642	-0.226812	-0.0182575		0.663933	-34.3662	-0.232232	-0.0186938
25815	Postcentral Gyrus, R	H-O-D	None	13765.5	1803.66	0.200203	0	-480.536	-3.49087	-0.266422		0	1125.16	8.1738	0.623821		0.283818	-18.6715	-0.13564	-0.010352		0.0569308	-95.4293	-0.69325	-0.0529086		2.12449e-05	-169.14	-1.22872	-0.0937758		0.0602987	-32.9305	-0.239225	-0.0182575		0.0356092	-38.3223	-0.278394	-0.0212469		0.858758	-13.6471	-0.0991399	-0.00756632
25816	Superior Parietal Lobule, L	H-O-D	cognitive	6654.45	1155.9	0.0744404	0	-214.073	-3.21699	-0.1852		0	385.636	5.79516	0.333624		0.900624	1.49962	0.0225356	0.00129737		0.179774	-46.3509	-0.69654	-0.0400995		0.518562	-17.6966	-0.265936	-0.0153098		0.00455116	-34.2898	-0.515291	-0.029665		0.208822	15.7994	0.237426	0.0136685		0.30728	53.9758	0.811124	0.046696
25817	Superior Parietal Lobule, R	H-O-D	cognitive	6020.63	1109.17	0.0602075	0	-188.223	-3.12631	-0.169698		0	331.674	5.50896	0.29903		0.0766564	-20.5614	-0.341516	-0.0185377		0.0528092	-64.7056	-1.07473	-0.0583371		0.246844	-30.6979	-0.509879	-0.0276766		0.297604	-12.1704	-0.202144	-0.0109725		0.473082	-8.72136	-0.144858	-0.00786299		0.80703	-12.4869	-0.207402	-0.0112579
25818	SMG, ant., L	H-O-D	None	4142.05	795.243	0.0274962	0	-67.0719	-1.61929	-0.0843414		0	177.513	4.28562	0.223218		0.155544	-12.1348	-0.292966	-0.0152592		0.242389	-28.6795	-0.6924	-0.0360639		0.711245	-7.2237	-0.174399	-0.00908365		0.587808	4.66882	0.112718	0.00587094		0.859089	1.59034	0.038395	0.00199981		0.245376	-43.527	-1.05086	-0.0547342
25819	SMG, ant., R	H-O-D	None	4082.37	757.396	0.0486424	2.22045e-16	-83.8614	-2.05423	-0.110723		0	277.357	6.79402	0.366198		0.65386	-3.59006	-0.0879406	-0.00474001		0.247799	-26.547	-0.650283	-0.0350503		0.0697073	-33.0307	-0.809106	-0.0436109		0.508455	-5.32553	-0.130452	-0.00703137		0.13705	-12.4477	-0.304914	-0.0164349		0.892953	-4.7422	-0.116163	-0.00626119
25820	SMG, post., L	H-O-D	None	6015.88	1019.92	0.0323185	0	-90.6498	-1.50684	-0.0888797		0	224.875	3.73802	0.220484		0.726784	-3.80483	-0.0632464	-0.00373053		0.368641	-28.1093	-0.467251	-0.0275604		0.586964	-13.4921	-0.224274	-0.0132286		0.740878	3.62538	0.0602634	0.00355459		0.0811757	-19.8527	-0.330004	-0.019465		0.103857	-77.4935	-1.28815	-0.0759803
25821	SMG, post., R	H-O-D	None	7113.55	1287.57	0.0704321	0	-285.768	-4.01723	-0.221943		0	300.799	4.22854	0.233617		0.544957	8.19628	0.115221	0.00636569		0.012447	-96.6556	-1.35875	-0.0750681		0.0128412	-76.4549	-1.07478	-0.0593791		0.107559	-21.8785	-0.30756	-0.016992		0.0251348	-31.653	-0.444967	-0.0245835		0.324269	-58.4805	-0.822099	-0.0454192
25822	Angular Gyrus, L	H-O-D	None	5277.18	959.122	0.0409407	0	-85.998	-1.62962	-0.0896633		0	287.017	5.43883	0.29925		0.953051	-0.600734	-0.0113836	-0.000626337		0.669548	-12.514	-0.237134	-0.0130473		0.0741993	-41.4248	-0.784981	-0.0431904		0.204073	-13.0235	-0.246789	-0.0135786		0.0588829	-20.1404	-0.381651	-0.0209988		0.531451	-28.0361	-0.53127	-0.029231
25823	Angular Gyrus, R	H-O-D	None	7150.16	1351.83	0.0461239	0	-234.546	-3.2803	-0.173503		1.6651e-09	178.556	2.49723	0.132084		0.158235	-20.2827	-0.283667	-0.0150038		0.216991	-50.9459	-0.712514	-0.0376865		0.0262027	-72.6829	-1.01652	-0.0537663		0.52654	9.17763	0.128356	0.00678903		0.0536908	-29.0125	-0.40576	-0.0214616		0.0906356	-106.426	-1.48844	-0.0787269
25824	Lateral Occipital Cx, sup., L	H-O-D	None	21090.3	2690.88	0.159936	0	-757.585	-3.5921	-0.281538		0	1388.19	6.5821	0.515886		0.00113912	-86.6825	-0.411006	-0.0322134		0.00128766	-246.706	-1.16976	-0.0916823		0.000222589	-224.528	-1.0646	-0.0834405		0.0202118	-62.242	-0.295121	-0.0231307		0.0123834	-69.7354	-0.330651	-0.0259155		0.729233	-40.5836	-0.192427	-0.0150819
25825	Lateral Occipital Cx, sup., R	H-O-D	None	20216.5	2640.75	0.126985	0	-850.456	-4.20675	-0.322051		0	814.113	4.02698	0.308288		0.0337732	-56.5606	-0.279775	-0.0214184		0.451102	-57.7613	-0.285714	-0.0218731		0.330001	-59.2387	-0.293022	-0.0224325		0.00247567	-81.141	-0.401361	-0.0307265		0.0231495	-63.338	-0.313299	-0.0239848		0.887332	-16.6163	-0.0821921	-0.00629228
25826	Lateral Occipital Cx, inf., L	H-O-D	None	9411.84	1435.55	0.0543389	0	-259.159	-2.75354	-0.180529		0	316.717	3.3651	0.220625		0.129787	-22.9331	-0.243662	-0.0159752		0.552822	-25.8446	-0.274597	-0.0180033		0.367377	-31.1319	-0.330774	-0.0216864		0.630959	-7.32224	-0.0777982	-0.00510066		0.19994	-20.3119	-0.215812	-0.0141492		0.823891	-14.8358	-0.157629	-0.0103346
25827	Lateral Occipital Cx, inf., R	H-O-D	None	10023.3	1494.83	0.0569168	0	-366.545	-3.65695	-0.245209		0.00188943	-99.0924	-0.988624	-0.06629		0.0285475	-34.4969	-0.344168	-0.0230774		0.819123	-10.3759	-0.103518	-0.00694116		0.330795	-34.9677	-0.348865	-0.0233924		0.329283	-15.4767	-0.154408	-0.0103535		0.495689	-11.2465	-0.112204	-0.00752359		0.870081	11.3676	0.113412	0.00760457
25828	Intracalcarine Cx, L	H-O-D	None	3371.81	734.937	0.0278943	0	-114.229	-3.38776	-0.155427		0.013108	39.7755	1.17965	0.054121		0.0173825	-18.6181	-0.552169	-0.0253329		0.134111	-33.6585	-0.998232	-0.0457978		0.353431	-16.5828	-0.491807	-0.0225636		0.211953	9.87103	0.292751	0.0134311		0.191235	-10.7196	-0.317919	-0.0145858		0.267646	-38.0816	-1.12941	-0.0518162
25829	Intracalcarine Cx, R	H-O-D	None	3511.67	696.786	0.0342389	0	-128.345	-3.65482	-0.184196		5.35986e-06	69.2037	1.97068	0.0993185		0.0141294	-18.146	-0.516733	-0.0260424		0.501374	-14.309	-0.40747	-0.0205357		0.374192	-15.0039	-0.427257	-0.021533		0.170436	10.2389	0.291567	0.0146945		0.313293	-7.81507	-0.222545	-0.0112159		0.221657	-39.6556	-1.12925	-0.0569122
25830	Frontal Medial Cx, L	H-O-D	cognitive	2463.88	405.376	0.0810497	0	-89.7665	-3.64329	-0.22144		0	97.4724	3.95605	0.240449		0.786533	-1.13657	-0.0461291	-0.00280373		0.583905	-6.6131	-0.268401	-0.0163135		0.00717244	-25.7625	-1.0456	-0.063552		0.559963	-2.46136	-0.0998974	-0.00607178		0.35126	-4.09498	-0.1662	-0.0101017		0.388408	15.9353	0.646755	0.0393099
25831	Frontal Medial Cx, R	H-O-D	cognitive	2461.37	410.535	0.0922025	0	-86.7466	-3.52431	-0.211301		0	116.237	4.72244	0.283136		0.569353	2.40309	0.0976321	0.00585356		0.941754	-0.887783	-0.0360686	-0.0021625		0.000914783	-31.9718	-1.29894	-0.0778784		0.320794	-4.21886	-0.171403	-0.0102765		0.00339904	-12.9519	-0.526205	-0.0315488		0.681611	7.62757	0.309891	0.0185796
25832	Juxtapositional Lobule Cx, L	H-O-D	None	3719.42	683.808	0.0500526	0	-128.276	-3.44882	-0.187591		0	159.166	4.27931	0.232764		0.0236789	-16.2858	-0.437858	-0.0238163		0.0192066	-48.4957	-1.30385	-0.07092		0.241592	-19.24	-0.517285	-0.0281365		0.583923	-3.96617	-0.106634	-0.00580012		0.368009	6.78241	0.182351	0.00991859		0.649142	14.4156	0.387577	0.0210814
25833	Juxtapositional Lobule Cx, R	H-O-D	None	3600.27	689.016	0.0589729	0	-143.904	-3.99704	-0.208855		0	149.389	4.14938	0.216815		0.0755947	-12.8269	-0.356277	-0.0186163		0.0299669	-45.0822	-1.25219	-0.0654299		0.0236169	-37.2968	-1.03595	-0.0541306		0.431891	-5.70824	-0.15855	-0.00828463		0.738335	-2.52403	-0.0701068	-0.00366325		0.915865	3.35697	0.0932423	0.00487213
25834	Subcallosal Cx, L	H-O-D	None	3775.51	401.021	0.0831397	0	-112.893	-2.99015	-0.281515		5.44986e-05	34.1923	0.905635	0.0852632		0.0274865	-9.14306	-0.242168	-0.0227995		0.13109	-17.9929	-0.47657	-0.0448678		0.129086	-14.3569	-0.380265	-0.035801		0.0226739	9.5331	0.252499	0.0237721		0.707381	-1.63098	-0.043199	-0.00406708		0.0196696	-42.3998	-1.12302	-0.10573
25835	Subcallosal Cx, R	H-O-D	None	3497.5	348.401	0.0294842	0	-52.1985	-1.49245	-0.149823		0.000314344	27.298	0.780501	0.0783523		0.13014	-5.61869	-0.160649	-0.0161271		0.419364	-8.62052	-0.246477	-0.0247431		0.559979	4.94622	0.141422	0.0141969		0.0772035	6.61211	0.189053	0.0189785		0.647322	-1.77854	-0.0508518	-0.00510487		0.0437414	-32.8279	-0.93861	-0.0942244
25836	Paracingulate Gyrus, L	H-O-D	cognitive	7418.83	944.301	0.155158	0	-323.983	-4.36703	-0.343093		0	265.891	3.584	0.281575		0.0696986	-17.1771	-0.231534	-0.0181903		0.0844858	-46.9097	-0.632306	-0.0496766		0.0105334	-55.153	-0.743419	-0.0584062		0.33966	-9.10211	-0.122689	-0.00963899		0.00859654	-26.0341	-0.350919	-0.0275697		0.277499	-45.1832	-0.609034	-0.0478483
25837	Paracingulate Gyrus, R	H-O-D	cognitive	7350.54	983.371	0.179577	0	-359.759	-4.89432	-0.365843		0	372.76	5.07118	0.379063		0.0313141	-20.9463	-0.284963	-0.0213005		0.757455	8.66023	0.117818	0.00880667		0.255445	-25.2441	-0.343431	-0.025671		0.418995	-7.91677	-0.107703	-0.00805064		0.0307806	-21.9933	-0.299207	-0.0223652		0.110466	-68.1324	-0.926903	-0.0692845
25838	Cingulate Gyrus, ant., L	H-O-D	cognitive	6501.75	1170.65	0.00881414	4.02822e-06	10.0928	0.155232	0.00862153		4.24797e-11	164.779	2.53438	0.140759		0.303191	-12.4831	-0.191996	-0.0106634		0.823953	7.77173	0.119533	0.00663883		0.114103	43.9175	0.675472	0.0375155		0.147436	-17.6648	-0.271694	-0.0150898		0.857149	-2.2861	-0.0351613	-0.00195285		0.331649	-51.6571	-0.794511	-0.0441269
25839	Cingulate Gyrus, ant., R	H-O-D	cognitive	7185.47	1303.55	0.00643706	0.00283756	54.0543	0.752273	0.041467		2.09837e-09	167.991	2.33793	0.128872		0.449327	-10.3104	-0.143489	-0.00790943		0.536232	-24.2282	-0.337183	-0.0185863		0.280311	33.6884	0.46884	0.0258435		0.0441467	-27.5678	-0.38366	-0.0211482		0.408028	11.8209	0.164511	0.0090682		0.85698	10.8279	0.150692	0.00830649
25840	Cingulate Gyrus, post., L	H-O-D	None	6720.26	711.731	0.0381158	0	-90.1053	-1.3408	-0.1266		1.24081e-11	-101.932	-1.51679	-0.143218		0.537525	-4.59532	-0.0683801	-0.00645655		0.768577	-6.30849	-0.0938727	-0.00886359		0.816607	3.94788	0.0587459	0.00554687		0.892147	1.01718	0.015136	0.00142916		0.953247	0.457567	0.00680877	0.000642893		0.00292877	-96.965	-1.44288	-0.136238
25841	Cingulate Gyrus, post., R	H-O-D	None	7033.68	730.49	0.0233013	0	-59.8979	-0.851586	-0.0819969		0.00624759	-42.5783	-0.605348	-0.0582873		0.538242	-4.73117	-0.0672644	-0.0064767		0.222416	-26.9425	-0.38305	-0.0368828		0.860271	3.09037	0.0439368	0.00423055		0.629082	-3.73604	-0.0531165	-0.00511444		0.343956	-7.61337	-0.108242	-0.0104223		0.0439535	-67.8719	-0.964956	-0.0929129
25842	Precuneous Cx, L	H-O-D	None	13066.9	1440.12	0.114947	0	-384.177	-2.94008	-0.266767		0	406.428	3.11036	0.282218		0.14608	-21.2091	-0.162312	-0.0147273		0.0859825	-71.9416	-0.550564	-0.0499552		0.815397	7.78429	0.0595727	0.0054053		0.754755	4.59032	0.0351294	0.00318745		0.041433	-31.1353	-0.238276	-0.0216199		0.946419	-4.31942	-0.0330562	-0.00299934
25843	Precuneous Cx, R	H-O-D	None	13656.7	1530.05	0.132385	0	-459.239	-3.36275	-0.300146		0	429.975	3.14846	0.28102		0.0321347	-32.9799	-0.241493	-0.0215547		0.171932	-60.4246	-0.442455	-0.0394919		0.37855	-30.9358	-0.226525	-0.0202188		0.435562	12.0932	0.0885515	0.00790376		0.0133609	-39.8498	-0.291798	-0.0260448		0.845925	-13.1743	-0.0964677	-0.00861033
25844	Cuneal Cx, L	H-O-D	None	2548.3	480.226	0.0629429	0	-107.158	-4.20506	-0.22314		0	116.191	4.55953	0.24195		0.353663	-4.70483	-0.184626	-0.00979711		0.177512	-19.6221	-0.770006	-0.0408601		0.629137	5.60302	0.219873	0.0116675		0.0947747	-8.52101	-0.33438	-0.0177437		0.124784	-8.14509	-0.319628	-0.0169609		0.17277	30.6561	1.203	0.0638368
25845	Cuneal Cx, R	H-O-D	None	3020.97	549.392	0.0612553	0	-133.083	-4.40532	-0.242238		0.00117896	38.3748	1.27028	0.0698495		0.368359	-5.20149	-0.172179	-0.00946772		0.274106	-18.1551	-0.60097	-0.0330458		0.961049	-0.645062	-0.0213528	-0.00117414		0.484861	-4.06451	-0.134543	-0.0073982		0.957683	-0.321411	-0.0106393	-0.000585029		0.759022	-7.80514	-0.258365	-0.0142069
25846	Frontal Orbital Cx, L	H-O-D	None	8605.82	911.445	0.157135	0	-332.554	-3.86429	-0.364864		0	201.453	2.3409	0.221026		0.11357	-14.3012	-0.16618	-0.0156906		0.55511	-15.3437	-0.178294	-0.0168344		0.228445	-24.8455	-0.288705	-0.0272594		0.878593	1.38895	0.0161396	0.0015239		0.576127	-5.28846	-0.0614521	-0.00580228		0.299229	-41.3004	-0.479912	-0.0453131
25847	Frontal Orbital Cx, R	H-O-D	None	7820.53	853.307	0.164291	0	-298.809	-3.82083	-0.350178		0	238.62	3.0512	0.279641		0.624607	-4.12234	-0.0527118	-0.00483102		0.676599	-10.1096	-0.12927	-0.0118476		0.511561	-12.6226	-0.161403	-0.0147925		0.941914	0.617608	0.00789726	0.000723782		0.352201	-8.2039	-0.104902	-0.00961424		0.190934	-48.5038	-0.620211	-0.0568421
25848	parahipp. Gyrus, ant., L	H-O-D	cognitive	3815.7	474.735	0.0580255	0	-123.027	-3.22423	-0.259149		0.132662	15.1943	0.398205	0.0320059		0.284074	-5.33028	-0.139694	-0.0112279		0.697706	5.56045	0.145726	0.0117127		2.62341e-05	-47.7711	-1.25196	-0.100627		0.619844	-2.48352	-0.0650869	-0.00523138		0.614683	-2.62188	-0.0687129	-0.00552282		0.447959	-16.6217	-0.435614	-0.0350126
25849	parahipp. Gyrus, ant., R	H-O-D	cognitive	3894.34	500.902	0.0486111	0	-121.349	-3.11603	-0.242261		3.11742e-07	-54.8512	-1.40848	-0.109505		0.765924	1.57062	0.0403308	0.00313559		0.564089	8.75461	0.224803	0.0174777		1.87022e-06	-57.4424	-1.47502	-0.114678		0.271186	-5.84085	-0.149983	-0.0116607		0.358398	-5.07183	-0.130236	-0.0101254		0.823993	-5.1654	-0.132639	-0.0103122
25850	parahipp. Gyrus, post., L	H-O-D	cognitive	2206.37	272.052	0.0825442	0	-67.9077	-3.0778	-0.249612		0	97.6905	4.42766	0.359087		0.0250363	-6.30722	-0.285864	-0.0231838		0.47588	5.77262	0.261634	0.0212188		0.160461	-9.01651	-0.408658	-0.0331425		0.000658763	-9.648	-0.437279	-0.0354638		0.215149	3.65155	0.1655	0.0134222		0.634109	5.89655	0.267251	0.0216743
25851	parahipp. Gyrus, post., R	H-O-D	cognitive	1785.66	227.769	0.0857256	0	-52.4227	-2.93575	-0.230157		0	90.6025	5.07389	0.397783		0.360659	-2.15013	-0.120411	-0.00943998		0.274649	7.39277	0.414007	0.0324574		0.219198	-6.59687	-0.369435	-0.028963		5.53609e-05	-9.54583	-0.534582	-0.0419102		0.486169	1.71461	0.0960212	0.00752788		0.750003	-3.29929	-0.184766	-0.0144853
25852	Lingual Gyrus, L	H-O-D	None	8383.82	901.076	0.0461272	0	-216.435	-2.58158	-0.240196		3.47763e-06	-89.6073	-1.06881	-0.0994447		0.050265	-18.6072	-0.221941	-0.0206499		0.174242	-37.1517	-0.443136	-0.0412304		0.00386094	-62.6922	-0.747776	-0.0695748		0.118008	-14.9481	-0.178297	-0.0165892		0.666803	-4.28289	-0.0510852	-0.00475308		0.794542	10.8949	0.129952	0.012091
25853	Lingual Gyrus, R	H-O-D	None	8987.4	920.198	0.0559265	0	-245.47	-2.73127	-0.266758		0.0133405	-48.5277	-0.539953	-0.0527361		0.0816898	-16.8117	-0.187058	-0.0182696		0.805869	-6.82714	-0.0759634	-0.0074192		9.7355e-05	-85.9298	-0.956114	-0.0933818		0.0804703	-16.983	-0.188964	-0.0184557		0.743211	-3.31107	-0.0368413	-0.00359822		0.165394	-58.9659	-0.656095	-0.0640796
25854	Temp. Fusiform Cx, ant., L	H-O-D	None	1953.76	293.143	0.0756471	0	-75.4478	-3.86168	-0.257375		0.000226274	22.8011	1.16704	0.0777814		0.605023	-1.57415	-0.0805706	-0.00536991		0.236892	-10.3577	-0.530145	-0.0353334		3.57627e-08	-38.3179	-1.96124	-0.130714		0.0721326	5.50745	0.28189	0.0187876		0.159792	-4.47888	-0.229244	-0.0152788		0.120903	-20.7827	-1.06373	-0.070896
25855	Temp. Fusiform Cx, ant., R	H-O-D	None	1790.9	263.329	0.0509542	0	-57.6501	-3.21905	-0.218928		0.0256336	-12.5565	-0.701125	-0.0476837		0.812404	0.657474	0.0367119	0.00249678		0.780232	2.22387	0.124176	0.00844522		0.000563437	-21.8151	-1.21811	-0.0828436		0.720089	0.998823	0.055772	0.00379307		0.0140422	-7.12368	-0.39777	-0.0270524		0.511141	-8.01332	-0.447445	-0.0304309
25856	Temp. Fusiform Cx, post., L	H-O-D	None	5155.25	632.702	0.091652	0	-186.14	-3.61069	-0.294199		1.05989e-08	76.5341	1.48459	0.120964		0.00235649	-19.8366	-0.384785	-0.0313523		0.501759	-12.6112	-0.244629	-0.0199324		0.986246	0.257103	0.0049872	0.000406357		0.730099	2.26837	0.0440012	0.00358522		0.0637537	-12.6642	-0.245656	-0.0200161		0.341727	27.4188	0.531862	0.0433361
25857	Temp. Fusiform Cx, post., R	H-O-D	None	4202.23	522.258	0.0855777	0	-141.033	-3.35615	-0.270045		1.21977e-10	71.6489	1.70502	0.137191		0.00971169	-14.0179	-0.333581	-0.0268409		0.181476	20.9235	0.497914	0.0400636		1.24886e-06	-59.6852	-1.42032	-0.114283		0.549321	-3.2694	-0.0778015	-0.00626013		0.172259	-7.74984	-0.184422	-0.0148391		0.880448	-3.59286	-0.0854988	-0.00687948
25858	Temp. Occipital Fusiform Cx, L	H-O-D	None	3376.74	541.659	0.0391023	0	-101.021	-2.99168	-0.186503		0.000265546	42.6136	1.26198	0.0786723		0.363907	-5.18619	-0.153586	-0.00957463		0.121597	-25.366	-0.7512	-0.0468302		0.518618	8.43276	0.249731	0.0155684		0.690375	-2.29027	-0.0678249	-0.00422825		0.353648	-5.5454	-0.164224	-0.0102378		0.943884	1.77174	0.0524691	0.00327096
25859	Temp. Occipital Fusiform Cx, R	H-O-D	None	4297.89	671.548	0.0530903	0	-151.314	-3.52065	-0.225321		0.353117	13.2989	0.309429	0.0198034		0.239704	-8.27171	-0.19246	-0.0123174		0.0580865	-38.2262	-0.889418	-0.0569226		0.342526	-15.2304	-0.354369	-0.0226795		0.296819	7.39837	0.17214	0.0110169		0.549663	4.41211	0.102658	0.00657006		0.448682	23.5505	0.547955	0.035069
25860	Occipital Fusiform Gyrus, L	H-O-D	None	5078.83	733.275	0.104166	0	-214.409	-4.22163	-0.2924		0	144.534	2.84582	0.197108		0.166032	-10.3808	-0.204394	-0.0141568		0.0194574	-50.39	-0.992159	-0.0687192		0.010199	-43.9556	-0.865467	-0.0599442		8.92311e-05	-29.5576	-0.581976	-0.040309		0.227552	-9.46642	-0.18639	-0.0129098		0.361403	-30.1121	-0.592894	-0.0410652
25861	Occipital Fusiform Gyrus, R	H-O-D	None	4800.55	734.206	0.110847	0	-228.452	-4.75887	-0.311155		0	183.801	3.82875	0.250339		0.0359545	-15.8153	-0.329448	-0.0215407		0.147927	-31.3355	-0.652749	-0.0426794		0.0268926	-38.0025	-0.791627	-0.0517599		0.569655	-4.31811	-0.0899503	-0.00588132		0.411977	-6.48092	-0.135004	-0.00882711		0.290494	-35.0133	-0.729361	-0.0476887
25862	Frontal Operculum Cx, L	H-O-D	cognitive	1949.52	317.606	0.113068	0	-85.3442	-4.3777	-0.268711		0	82.7617	4.24523	0.26058		0.493106	-2.23702	-0.114747	-0.00704339		0.541004	-5.73518	-0.294184	-0.0180575		0.293753	-7.81116	-0.40067	-0.0245939		0.504933	2.19208	0.112442	0.00690188		0.0500556	-6.68753	-0.343034	-0.0210561		0.0874966	-24.4138	-1.2523	-0.0768682
25863	Frontal Operculum Cx, R	H-O-D	cognitive	1728.95	300.598	0.0983871	0	-76.5121	-4.42534	-0.254533		0	65.4206	3.78383	0.217635		0.207911	-3.90837	-0.226054	-0.013002		0.192921	-11.5995	-0.670899	-0.0385882		0.287512	-7.52664	-0.43533	-0.0250389		0.981249	-0.0734702	-0.00424941	-0.000244414		0.117411	-5.08479	-0.294097	-0.0169156		0.283909	-14.5947	-0.844135	-0.0485522
25864	Central Opercular Cx, L	H-O-D	None	4868.07	642.226	0.153048	0	-217.208	-4.46188	-0.33821		0	112.199	2.30479	0.174703		0.736224	-2.16171	-0.044406	-0.00336597		0.963549	0.844028	0.017338	0.00131422		0.000372898	-51.8781	-1.06568	-0.0807786		0.0110515	16.4413	0.337737	0.0256004		0.157523	-9.48777	-0.194898	-0.0147733		0.157458	-39.784	-0.817243	-0.061947
25865	Central Opercular Cx, R	H-O-D	None	4818.75	667.348	0.152461	0	-222.734	-4.62224	-0.33376		0	166.084	3.44662	0.248872		0.890602	0.912508	0.0189366	0.00136736		0.0289267	-41.5178	-0.861587	-0.0622131		0.0578064	-28.6446	-0.59444	-0.042923		0.0170412	15.953	0.331061	0.0239051		0.130717	-10.4832	-0.21755	-0.0157087		0.687527	-11.7315	-0.243455	-0.0175793
25866	Parietal Operculum Cx, L	H-O-D	None	2659.55	514.77	0.0466169	0	-91.2929	-3.43264	-0.177347		4.40581e-12	-75.8293	-2.8512	-0.147307		0.158406	-7.69657	-0.289393	-0.0149515		0.799372	3.99873	0.150354	0.00776799		0.977305	0.354852	0.0133425	0.000689341		1.08325e-05	24.3142	0.914221	0.0472331		0.670162	-2.4351	-0.0915604	-0.00473045		0.99544	-0.137469	-0.00516889	-0.00026705
25867	Parietal Operculum Cx, R	H-O-D	None	2629.92	472.074	0.0565389	0	-100.384	-3.81701	-0.212645		1.6583e-11	-66.9618	-2.54616	-0.141846		0.0909992	-8.36093	-0.317916	-0.0177111		0.107067	23.0727	0.877314	0.0488751		0.815017	-2.64446	-0.100553	-0.0056018		0.0211632	11.5171	0.437925	0.0243968		0.538355	-3.18898	-0.121258	-0.00675525		0.896291	2.84443	0.108156	0.00602538
25868	Planum Polare, L	H-O-D	Auditory	1769.6	250.579	0.176042	0	-79.6831	-4.5029	-0.317996		0	103.639	5.85663	0.413597		0.983972	0.0492466	0.00278293	0.000196531		0.764316	2.11572	0.11956	0.00844333		0.000952201	-18.3979	-1.03967	-0.0734217		0.638685	-1.15767	-0.0654199	-0.00461997		0.0814244	-4.46567	-0.252355	-0.0178214		0.670466	-4.58574	-0.25914	-0.0183006
25869	Planum Polare, R	H-O-D	Auditory	1875.52	256.595	0.202351	0	-92.9851	-4.95783	-0.36238		0	103.378	5.51194	0.402882		0.329745	-2.40436	-0.128197	-0.00937023		0.941662	-0.519652	-0.0277071	-0.00202518		3.05416e-05	-23.3576	-1.24539	-0.091029		0.00429742	7.107	0.378935	0.0276973		0.0287902	-5.64142	-0.300792	-0.0219856		0.627644	-5.26346	-0.28064	-0.0205127
25870	Heschl's Gyrus, L	H-O-D	Auditory	1536.81	308.272	0.125971	0	-105.432	-6.8604	-0.342008		0.0452385	-12.5469	-0.81642	-0.0407006		0.332738	3.00371	0.195451	0.0097437		0.308676	9.10047	0.592164	0.0295209		0.00676987	-19.0341	-1.23854	-0.0617444		0.00548532	8.68235	0.564957	0.0281645		0.884442	0.471369	0.0306718	0.00152907		0.718278	-4.9121	-0.319629	-0.0159343
25871	Heschl's Gyrus, R	H-O-D	Auditory	1322.28	232.834	0.160381	0	-87.7458	-6.63594	-0.376861		0.000209696	17.413	1.31689	0.0747875		0.35078	2.14525	0.162238	0.00921366		0.776975	-1.8708	-0.141483	-0.00803492		0.000692329	-17.676	-1.33678	-0.075917		0.000277958	8.43159	0.637655	0.0362129		0.0648256	-4.43288	-0.335245	-0.0190388		0.360283	-9.21926	-0.697223	-0.0395959
25872	Planum Temp.e, L	H-O-D	Auditory	2648.39	530.995	0.0619118	0	-95.1393	-3.59234	-0.179172		0	-153.639	-5.80123	-0.289343		0.739256	1.83152	0.0691559	0.00344922		0.797486	4.06412	0.153456	0.00765379		0.386547	10.8949	0.411378	0.0205179		1.98929e-07	28.9613	1.09354	0.0545417		0.459071	-4.25964	-0.160839	-0.008022		0.628434	11.7447	0.443466	0.0221184
25873	Planum Temp.e, R	H-O-D	Auditory	2079.25	350.495	0.0776917	0	-94.687	-4.5539	-0.270152		3.27227e-09	-43.4588	-2.09012	-0.123993		0.423948	2.92173	0.140518	0.00833601		0.241972	12.3288	0.592942	0.0351753		0.759552	-2.54943	-0.122613	-0.00727381		0.00700236	9.93304	0.477722	0.0283401		0.149802	-5.49766	-0.264406	-0.0156854		0.777595	4.54517	0.218597	0.0129679
25874	Supracalcarine Cx, L	H-O-D	None	654.58	134.649	0.0191234	0	-14.7255	-2.24961	-0.109362		0.124626	4.58786	0.700886	0.0340727		0.69815	-0.568302	-0.0868194	-0.00422062		0.887091	-0.598591	-0.0914465	-0.00444556		0.00496035	9.47183	1.44701	0.0703446		0.702798	-0.562549	-0.0859404	-0.00417789		0.0554155	-2.93326	-0.448113	-0.0217845		0.551524	-3.83179	-0.585381	-0.0284576
25875	Supracalcarine Cx, R	H-O-D	None	939.276	189.078	0.0278082	0	-25.5764	-2.723	-0.135269		0.0048905	11.7703	1.25313	0.062251		0.134517	-3.05776	-0.325545	-0.0161719		0.185007	-7.77217	-0.827464	-0.0411055		0.0451057	9.40743	1.00156	0.0497541		0.359939	1.88692	0.200891	0.00997958		0.351563	-1.99341	-0.212228	-0.0105428		0.102763	-14.5855	-1.55285	-0.07714
25876	Occipital Pole, L	H-O-D	None	11027.3	1650.75	0.0926933	0	-544.598	-4.93864	-0.32991		6.21725e-15	274.348	2.4879	0.166196		0.838938	-3.47141	-0.0314801	-0.00210293		0.0368256	-102.138	-0.926226	-0.0618735		0.144592	-56.7415	-0.514554	-0.0343731		0.000441023	-60.255	-0.546417	-0.0365016		0.26097	-20.0816	-0.182109	-0.0121652		0.148194	-108.204	-0.981236	-0.0655483
25877	Occipital Pole, R	H-O-D	None	10507.7	1540.36	0.0551018	0	-424.08	-4.0359	-0.275312		1.31331e-05	-144.106	-1.37144	-0.0935536		0.372024	-14.6197	-0.139134	-0.0094911		0.0150015	-114.08	-1.08568	-0.0740603		0.798655	-9.53797	-0.0907713	-0.00619203		0.00539301	-45.7916	-0.435791	-0.0297278		0.440104	-13.2351	-0.125957	-0.00859222		0.596328	-38.1447	-0.363017	-0.0247635
25878	Thalamus, L	H-O-D	Auditory	3476.16	360.141	0.0897124	1.95399e-14	-46.7079	-1.34366	-0.129693		0	194.028	5.58168	0.538756		0.45552	-2.7416	-0.0788687	-0.00761258		0.939185	-0.806635	-0.0232048	-0.00223978		0.538995	5.15761	0.148371	0.0143211		7.20545e-09	-21.3507	-0.614203	-0.0592842		0.48779	2.67023	0.0768155	0.0074144		0.00836215	-42.4135	-1.22012	-0.117769
25879	Thalamus, R	H-O-D	Auditory	3621.39	382.48	0.0621231	1.26693e-06	-5.50976	-0.152145	-0.0144053		0	168.903	4.66404	0.4416		0.491064	-2.59054	-0.0715344	-0.00677301		0.829845	-2.32599	-0.0642291	-0.00608133		0.0194065	20.1391	0.556115	0.052654		6.70279e-09	-21.9088	-0.604982	-0.0572808		0.27835	4.27279	0.117987	0.0111713		0.0101037	-42.3715	-1.17003	-0.110781
25880	Caudate, L	H-O-D	None	3864.73	749.092	0.0334975	1.12321e-12	90.2252	2.33458	0.120446		0	194.236	5.02585	0.259295		0.669817	3.10436	0.0803254	0.00414416		0.51275	-13.6808	-0.353991	-0.0182632		2.22045e-16	138.651	3.58759	0.185091		0.0683074	-13.3263	-0.344819	-0.01779		0.11467	12.0366	0.311447	0.0160682		0.174214	-43.289	-1.1201	-0.0577886
25881	Caudate, R	H-O-D	None	4109.05	783.632	0.0325971	0	117.395	2.857	0.149809		0	166.632	4.05525	0.21264		0.650974	3.42069	0.0832478	0.00436517		0.640186	-10.1516	-0.247056	-0.0129546		0	146.686	3.56984	0.187188		0.230437	-9.10958	-0.221696	-0.0116248		0.261683	8.88947	0.216339	0.0113439		0.207184	-41.7547	-1.01616	-0.0532835
25882	Putamen, L	H-O-D	None	2239.94	511.064	0.0109859	1.79915e-07	-49.3957	-2.20523	-0.0966527		1.89455e-10	72.5958	3.24097	0.142048		0.644893	-2.54122	-0.11345	-0.00497241		0.410377	-13.0293	-0.581679	-0.0254944		0.000108287	49.3075	2.20129	0.0964799		0.492368	-3.80782	-0.169996	-0.00745076		0.708975	-2.15436	-0.0961794	-0.00421544		0.146406	-34.9992	-1.56251	-0.0684829
25883	Putamen, R	H-O-D	None	2767.62	560.6	0.0193303	8.21054e-12	-69.1789	-2.49958	-0.123402		0	118.088	4.26676	0.210645		0.384661	-5.23608	-0.189191	-0.00934015		0.585954	-9.43173	-0.340788	-0.0168244		0.213728	17.1639	0.620167	0.030617		0.831178	-1.29284	-0.0467132	-0.00230618		0.814729	-1.47831	-0.0534146	-0.00263702		0.536775	-16.3448	-0.590574	-0.029156
25884	Pallidum, L	H-O-D	None	49.353	43.1487	0.0368501	0	5.73954	11.6296	0.133018		6.49465e-11	4.46694	9.05102	0.103524		0.185856	-0.424172	-0.859465	-0.00983046		0.0458558	-1.81573	-3.67908	-0.0420808		2.89833e-05	3.17259	6.42836	0.0735268		0.456034	0.242085	0.490518	0.00561048		0.0128224	0.846114	1.71442	0.0196093		0.548653	-0.842912	-1.70793	-0.0195351
25885	Pallidum, R	H-O-D	None	72.9002	49.178	0.0441518	0	8.57727	11.7658	0.174413		3.08809e-11	5.54169	7.60175	0.112686		0.741488	-0.130348	-0.178803	-0.00265053		0.454015	-0.846991	-1.16185	-0.017223		4.60898e-06	4.25842	5.84144	0.086592		0.789321	0.106397	0.145949	0.00216351		0.713166	0.152337	0.208966	0.00309766		0.296547	-1.79496	-2.46222	-0.0364992
25886	Hippocampus, L	H-O-D	cognitive	5439.48	486.427	0.150605	0	-158.069	-2.90595	-0.324959		0	242.669	4.46125	0.49888		0.403009	-4.0486	-0.0744299	-0.00832314		0.165329	19.3249	0.355272	0.0397283		0.000175415	-41.4788	-0.762551	-0.0852724		0.000143104	-18.5307	-0.340671	-0.0380955		0.588575	2.74102	0.0503913	0.00563501		0.257687	-24.1234	-0.443487	-0.049593
25887	Hippocampus, R	H-O-D	cognitive	5645.41	506.621	0.148593	0	-164.453	-2.91303	-0.324607		0	258.877	4.58561	0.510987		0.265482	-5.62125	-0.0995719	-0.0110956		0.121501	22.4908	0.39839	0.0443937		0.019693	-26.8763	-0.476074	-0.0530502		1.51589e-05	-21.9853	-0.389437	-0.043396		0.817024	-1.22255	-0.0216557	-0.00241315		0.233501	-26.4762	-0.468986	-0.0522604
25888	Amygdala, L	H-O-D	None	2349.13	261.571	0.159971	0	-103.553	-4.40814	-0.395888		0	89.3001	3.80141	0.341399		0.0016572	-8.1465	-0.346788	-0.0311445		0.973891	-0.243788	-0.0103778	-0.000932013		6.34778e-05	-23.6468	-1.00662	-0.0904029		0.667712	1.11828	0.0476039	0.00427523		0.327552	-2.65334	-0.11295	-0.0101439		0.224717	-13.8379	-0.589066	-0.0529031
25889	Amygdala, R	H-O-D	None	2695.4	292.132	0.193868	0	-121.936	-4.52386	-0.417401		0	121.024	4.49002	0.414278		0.00460616	-8.02785	-0.297835	-0.0274802		0.24641	9.44684	0.35048	0.0323375		3.29564e-05	-26.8597	-0.996501	-0.0919437		0.702984	1.08673	0.0403178	0.00371998		0.201853	-3.78445	-0.140404	-0.0129546		0.00678516	-33.7659	-1.25272	-0.115584
25890	Ventral Striatum, L	H-O-D	None	720.239	137.805	0.165474	0	-64.0182	-8.88846	-0.464556		9.04704e-08	14.7679	2.05041	0.107165		0.0133532	-3.36434	-0.467114	-0.0244137		0.0688397	-7.11737	-0.988196	-0.0516481		1.87042e-05	-13.2884	-1.845	-0.0964287		0.579666	-0.757635	-0.105192	-0.00549787		0.799551	0.361355	0.0501715	0.00262221		0.395638	-5.08389	-0.705861	-0.0368918
25891	Ventral Striatum, R	H-O-D	None	747.844	133.587	0.131586	0	-53.9687	-7.21657	-0.403996		0.000228945	10.0632	1.34563	0.0753307		0.126181	-2.05617	-0.274946	-0.0153919		0.00644271	-10.5397	-1.40935	-0.0788978		1.45355e-05	-13.312	-1.78005	-0.09965		0.176735	1.82736	0.24435	0.0136792		0.760051	0.429785	0.0574699	0.00321726		0.437834	-4.59181	-0.614006	-0.0343731
25892	Brain-Stem	H-O-D	Auditory	6310.65	1028.42	0.123029	0	-338.38	-5.36205	-0.329029		0	202.439	3.2079	0.196845		0.220539	-11.7794	-0.186659	-0.0114539		0.207654	-34.7929	-0.551337	-0.0338314		0.521401	14.1008	0.223445	0.0137111		6.69545e-06	-43.4779	-0.68896	-0.0422764		0.0442821	20.2966	0.321625	0.0197357		0.494278	-28.8914	-0.45782	-0.028093
25893	I-IV Cerebellum, L	H-O-D	None	2360.64	352.068	0.0861183	0	-92.8148	-3.93177	-0.263627		0	128.135	5.42798	0.363949		0.0508305	-7.18332	-0.304296	-0.0204032		0.873768	-1.68307	-0.0712975	-0.00478053		0.000924991	-27.6954	-1.17322	-0.0786648		0.0227481	-8.42733	-0.356994	-0.0239366		0.0146435	9.43226	0.399564	0.026791		0.013371	-39.7804	-1.68516	-0.112991
25894	I-IV Cerebellum, R	H-O-D	None	2679.91	386.114	0.0998004	0	-109.463	-4.08458	-0.2835		0	157.451	5.87524	0.407784		0.0147573	-9.74376	-0.363585	-0.0252355		0.0555434	-21.9606	-0.819453	-0.056876		0.0344105	-19.2592	-0.71865	-0.0498795		0.000451851	-14.0949	-0.525946	-0.0365045		0.086937	7.18227	0.268004	0.0186014		0.141636	-25.7747	-0.961776	-0.0667543
25895	V Cerebellum, L	H-O-D	None	3323.18	468.762	0.100047	0	-141.84	-4.2682	-0.302584		0	169.107	5.08872	0.360753		0.0727534	-8.61826	-0.259338	-0.0183852		0.672159	-5.84719	-0.175951	-0.0124737		0.00132574	-35.2028	-1.05931	-0.0750975		0.476182	-3.44263	-0.103594	-0.00734409		0.0790462	8.82931	0.265688	0.0188354		0.339572	-20.1908	-0.607576	-0.0430727
25896	V Cerebellum, R	H-O-D	None	3310.82	459.676	0.0925363	0	-138.753	-4.1909	-0.30185		0	159.025	4.80318	0.345949		0.0178017	-11.2085	-0.338541	-0.0243835		0.58773	-7.37621	-0.222791	-0.0160465		0.00422381	-30.8903	-0.93301	-0.0672002		0.145469	-6.92701	-0.209223	-0.0150693		0.10521	8.02032	0.242245	0.0174478		0.789201	5.56581	0.168109	0.0121081
25897	VI Cerebellum, L	H-O-D	None	8557.27	1319.09	0.165589	0	-535.475	-6.25754	-0.405943		0	482.469	5.63811	0.365759		0.000454491	-45.6397	-0.533344	-0.0345994		0.0576351	-71.079	-0.830626	-0.0538849		7.71901e-05	-117.461	-1.37265	-0.0890474		0.950754	-0.808556	-0.00944876	-0.000612965		0.567091	7.79548	0.0910977	0.00590974		0.670215	-24.3937	-0.285064	-0.0184928
25898	Vermis VI Cerebellum	H-O-D	None	1924.82	315.387	0.128326	0	-81.0092	-4.20865	-0.256857		0	173.519	9.01482	0.550179		0.278256	-3.44795	-0.179131	-0.0109324		0.60133	4.7802	0.248345	0.0151566		0.0016164	-22.8922	-1.18931	-0.0725845		0.0117433	-8.06339	-0.418916	-0.0255667		0.208293	4.18841	0.2176	0.0132802		0.243319	-16.3333	-0.848561	-0.0517882
25899	VI Cerebellum, R	H-O-D	None	8366.05	1286.73	0.167637	0	-519.418	-6.20864	-0.403674		0	521.186	6.22978	0.405048		0.00175697	-39.6727	-0.474211	-0.0308323		0.413629	-29.8186	-0.356424	-0.023174		3.88671e-05	-119.111	-1.42374	-0.0925688		0.372395	11.378	0.136002	0.00884258		0.228379	15.9849	0.191069	0.0124229		0.953998	-3.21943	-0.0384821	-0.00250203
25900	Crus I Cerebellum, L	H-O-D	None	13666.9	2096.42	0.172904	0	-744.904	-5.45043	-0.355322		0	985.607	7.21164	0.470138		0.0033247	-60.4688	-0.442448	-0.0288438		0.0130264	-147.121	-1.07648	-0.0701774		0.00228933	-143.383	-1.04912	-0.068394		0.750287	-6.59343	-0.0482438	-0.00314509		0.945209	-1.48119	-0.0108378	-0.000706532		0.82076	20.5369	0.150267	0.00979617
25901	Vermis Crus I Cerebellum	H-O-D	None	2.72827	1.97503	0.0108037	5.27356e-14	-0.229633	-8.41678	-0.116268		0.06744	0.0910327	3.33664	0.0460917		0.77368	-0.00695749	-0.255015	-0.00352272		0.31447	-0.0694313	-2.54488	-0.0351545		0.983921	0.00111418	0.0408384	0.000564134		0.237231	-0.0286891	-1.05155	-0.0145259		0.717855	-0.00914803	-0.335305	-0.00463184		0.420265	-0.0849412	-3.11337	-0.0430075
25902	Crus I Cerebellum, R	H-O-D	None	14761.5	2241.82	0.171042	0	-901.556	-6.10749	-0.402154		0	739.987	5.01296	0.330083		0.00228876	-67.2477	-0.455562	-0.0299969		0.00538611	-176.532	-1.19589	-0.0787448		3.63839e-05	-207.869	-1.40819	-0.0927233		0.80235	-5.55138	-0.0376072	-0.00247628		0.747113	-7.43987	-0.0504006	-0.00331868		0.191816	-126.661	-0.85805	-0.0564992
25903	Crus II Cerebellum, L	H-O-D	None	10184.1	1600.67	0.152887	0	-516.589	-5.0725	-0.322732		0	741.575	7.28169	0.46329		0.0543208	-30.6198	-0.300663	-0.0191293		0.201941	-58.4147	-0.573587	-0.0364939		4.09556e-10	-227.255	-2.23146	-0.141974		0.408072	-13.2439	-0.130045	-0.00827398		0.0419884	33.8728	0.332605	0.0211616		0.258905	-79.0792	-0.776496	-0.0494037
25904	Vermis Crus II Cerebellum	H-O-D	None	510.011	103.331	0.082279	0	-16.6876	-3.27201	-0.161496		0	50.0796	9.81932	0.484651		0.167184	-1.47682	-0.289566	-0.0142921		0.596297	1.62937	0.319477	0.0157684		0.00358663	-7.10884	-1.39386	-0.0687966		0.00163898	-3.38806	-0.664312	-0.0327883		0.52813	0.705974	0.138423	0.00683214		0.211096	-5.88577	-1.15405	-0.0569602
25905	Crus II Cerebellum, R	H-O-D	None	10006.1	1559.82	0.165963	0	-538.876	-5.38547	-0.345473		0	686.649	6.8623	0.44021		0.0145856	-37.5826	-0.375597	-0.0240942		0.0503966	-86.6103	-0.865573	-0.0555257		8.858e-10	-215.451	-2.15319	-0.138125		0.135774	-23.0914	-0.230773	-0.0148038		0.0577192	30.5643	0.305456	0.0195947		0.0759919	-120.183	-1.2011	-0.0770492
25906	VIIb Cerebellum, L	H-O-D	None	4850.21	901.645	0.149489	0	-289.295	-5.96458	-0.320852		0	407.224	8.39599	0.451645		0.00122039	-29.0513	-0.59897	-0.0322203		0.0229647	-58.7613	-1.21152	-0.0651711		2.22045e-16	-168.549	-3.47508	-0.186935		0.803771	2.24502	0.0462869	0.00248991		0.190834	12.2967	0.253529	0.0136381		0.088374	-67.3704	-1.38902	-0.0747194
25907	Vermis VIIb Cerebellum	H-O-D	None	174.468	38.1266	0.121738	0	-8.57427	-4.91454	-0.224889		0	20.7848	11.9133	0.545152		0.049531	-0.757954	-0.434439	-0.0198799		0.566416	-0.636526	-0.364839	-0.0166951		3.8311e-06	-4.07217	-2.33406	-0.106807		0.598557	-0.204408	-0.117161	-0.00536129		0.205417	0.511489	0.293172	0.0134155		0.224492	-2.06348	-1.18273	-0.0541218
25908	VIIb Cerebellum, R	H-O-D	None	5162.42	946.363	0.148418	0	-311.225	-6.02866	-0.328864		0	412.367	7.98786	0.435739		0.000306995	-34.0547	-0.659665	-0.0359848		0.175297	-36.7806	-0.712467	-0.0388652		4.44089e-16	-175.188	-3.39352	-0.185117		0.805072	2.34193	0.0453649	0.00247466		0.170516	13.5314	0.262113	0.0142983		0.0588886	-78.4401	-1.51944	-0.0828859
25909	VIIIa Cerebellum, L	H-O-D	None	4713.25	926.755	0.174544	0	-322.596	-6.84445	-0.348093		0	472.25	10.0196	0.509574		5.7563e-05	-36.5972	-0.776475	-0.0394897		0.185156	-34.6689	-0.735563	-0.037409		0	-185.471	-3.93509	-0.200129		0.954903	-0.51741	-0.0109778	-0.000558303		0.259924	10.7239	0.227526	0.0115714		0.0342077	-84.7837	-1.79884	-0.0914845
25910	Vermis VIIIa Cerebellum	H-O-D	None	1116.99	231.268	0.148046	0	-67.5193	-6.04474	-0.291953		0	126.978	11.3679	0.549052		0.00448458	-6.5527	-0.586638	-0.0283338		0.0997486	-10.9179	-0.97744	-0.047209		7.19927e-07	-26.0959	-2.33626	-0.112838		0.455949	-1.7292	-0.154808	-0.00747704		0.0464236	4.80597	0.43026	0.020781		0.127856	-15.4525	-1.3834	-0.0668162
25911	VIIIa Cerebellum, R	H-O-D	None	4736.56	976.05	0.178915	0	-314.543	-6.64075	-0.322261		0	538.302	11.3648	0.551511		0.000162074	-36.0425	-0.760942	-0.0369269		0.396697	-23.2917	-0.491743	-0.0238632		0	-203.665	-4.29985	-0.208663		0.288182	10.2079	0.215512	0.0104583		0.210863	12.5104	0.264123	0.0128173		0.0127796	-104.715	-2.21077	-0.107284
25912	VIIIb Cerebellum, L	H-O-D	None	3301.34	645.177	0.107385	0	-169.206	-5.12538	-0.262263		0	272.581	8.25668	0.42249		0.031083	-14.1952	-0.429983	-0.022002		0.215541	-23.4576	-0.71055	-0.0363584		4.44089e-14	-113.601	-3.44105	-0.176077		0.916042	0.698258	0.0211508	0.00108227		0.493946	4.71367	0.142781	0.00730602		0.0118359	-72.9564	-2.2099	-0.11308
25913	Vermis VIIIb Cerebellum	H-O-D	None	554.102	109.604	0.0999518	0	-23.7575	-4.28757	-0.216758		0	50.1581	9.05214	0.457631		0.00378186	-3.25255	-0.586995	-0.0296755		0.00188054	-10.0453	-1.81291	-0.0916514		2.85983e-08	-14.2378	-2.56953	-0.129902		0.993014	-0.00989298	-0.00178541	-9.02613e-05		0.686825	0.473885	0.0855231	0.00432362		0.0850432	-8.51383	-1.53651	-0.0776782
25914	VIIIb Cerebellum, R	H-O-D	None	3322.77	695.276	0.129512	0	-167.294	-5.03479	-0.240616		0	355.286	10.6925	0.511		0.0304484	-15.1644	-0.456378	-0.0218106		0.181829	-26.9132	-0.809962	-0.0387086		5.32907e-15	-125.256	-3.76962	-0.180153		0.806873	1.72321	0.0518608	0.00247846		0.144335	10.7062	0.322207	0.0153985		0.0176929	-73.1674	-2.202	-0.105235
25915	IX Cerebellum, L	H-O-D	None	2333.95	499.424	0.13522	0	-92.6711	-3.97058	-0.185556		0	324.338	13.8965	0.649423		0.00580511	-13.8167	-0.591989	-0.0276653		0.150487	-20.6849	-0.886265	-0.0414176		3.74034e-12	-78.401	-3.35916	-0.156983		0.574976	2.83529	0.121481	0.00567712		0.336041	5.06304	0.216931	0.0101378		0.0354903	-46.0359	-1.97245	-0.092178
25916	Vermis IX Cerebellum	H-O-D	None	532.114	114.736	0.0893305	0	-18.3152	-3.44196	-0.159628		0	60.7172	11.4106	0.529188		0.079347	-2.12394	-0.39915	-0.0185114		0.0907151	-5.87088	-1.10331	-0.0511684		1.96508e-06	-13.0166	-2.44621	-0.113448		0.63681	0.576515	0.108344	0.00502469		0.258667	1.43603	0.269872	0.0125159		0.0286233	-11.5601	-2.17248	-0.100754
25917	IX Cerebellum, R	H-O-D	None	2621.72	546.863	0.133998	0	-94.2157	-3.59367	-0.172284		0	352.485	13.4448	0.644558		0.00553429	-15.2601	-0.582065	-0.0279048		0.013231	-39.0281	-1.48865	-0.0713672		1.62315e-13	-91.3862	-3.48574	-0.16711		0.678067	-2.30261	-0.0878284	-0.00421058		0.792961	1.51577	0.057816	0.00277176		0.0455371	-48.112	-1.83513	-0.0879781
25918	X Cerebellum, L	H-O-D	None	645.515	96.1416	0.0859502	0	-29.436	-4.56009	-0.306174		0	19.8389	3.07334	0.206351		0.179466	-1.33254	-0.20643	-0.0138602		0.704054	-1.08478	-0.168048	-0.0112831		0.0180391	-5.35886	-0.830169	-0.0557392		0.00370737	-2.89897	-0.449095	-0.0301531		0.753035	-0.326909	-0.0506431	-0.00340028		0.555347	2.57708	0.399229	0.026805
25919	Vermis X Cerebellum	H-O-D	None	293.313	57.828	0.146372	0	-12.3964	-4.22633	-0.214366		0	39.3953	13.4311	0.68125		0.506856	-0.382575	-0.130432	-0.00661573		0.194456	-2.14526	-0.73139	-0.0370973		0.000464168	-4.57421	-1.5595	-0.0791002		0.00456145	-1.64179	-0.559738	-0.0283908		0.198419	0.777484	0.26507	0.0134448		0.08781	-4.30274	-1.46694	-0.0744058
25920	X Cerebellum, R	H-O-D	None	594.665	96.2961	0.104996	0	-31.9161	-5.36706	-0.331437		0	22.4669	3.77807	0.23331		0.520398	-0.632325	-0.106333	-0.00656647		0.544779	-1.71413	-0.288251	-0.0178006		0.00799841	-5.95689	-1.00172	-0.0618601		0.123672	-1.52401	-0.256279	-0.0158262		0.36737	0.928269	0.156099	0.00963974		0.00712575	11.6564	1.96016	0.121047
